# Supplementary material
Source: MDPI journal article supplement (https://www.mdpi.com/1424-8247/14/12/1292)
Supplement: s1 [file s1]

# Acquired drug resistance enhances imidazoquinoline efflux by P-glycoprotein

Anunay J. Pulukuri, Anthony J. Burt, Larissa K. Opp, Colin M. McDowell, Maryam Davaritouchaee, Amy E. Nielsen, and Rock J. Mancini

Washington State University, Department of Chemistry  
1470 E College Ave, Pullman, WA 99164, United States

## Table of Contents:

|                                                             |    |
|-------------------------------------------------------------|----|
| K <sub>D</sub> values of Imidazoquinolines .....            | 2  |
| Supporting Figures .....                                    | 3  |
| Progression of MDR derived cancer cell lines .....          | 10 |
| Flow Cytometry Histograms from Competitive Experiments .... | 13 |
| Flow Cytometry Histograms from Uptake Experiments .....     | 14 |
| Synthetic Procedure for Gardiquimod .....                   | 15 |
| Characterization of Gardiquimod .....                       | 17 |
| References .....                                            | 23 |

### $K_D$ values of imidazoquinolines

| $\frac{P_i}{P_{i\max}} = \frac{[\text{imidazoquinoline}]}{[\text{imidazoquinoline}] + K_D}$ |                                          |                |
|---------------------------------------------------------------------------------------------|------------------------------------------|----------------|
| Imidazoquinoline                                                                            | Calculated $K_D$ value ( $\mu\text{M}$ ) | Sum of squares |
| Imiquimod (IMQ)                                                                             | 7.66                                     | 0.01999        |
| Resiquimod (RSQ)                                                                            | 24.37                                    | 0.14159        |
| Gardiquimod (GDQ)                                                                           | -                                        | -              |

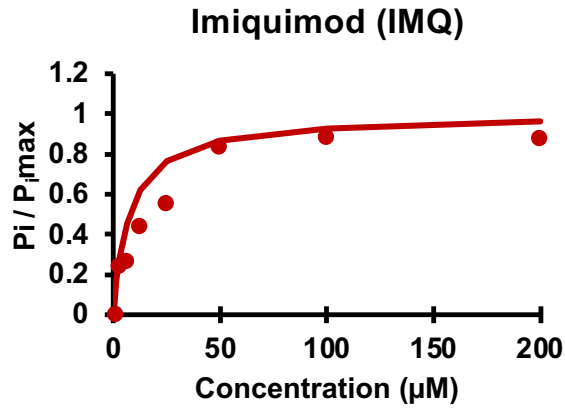

● Exp. — Calculated

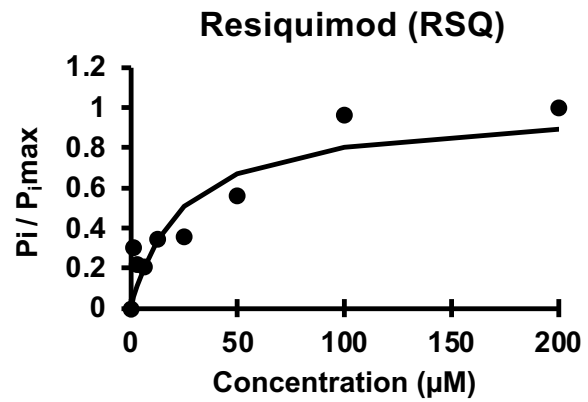

● Exp. — Calculated

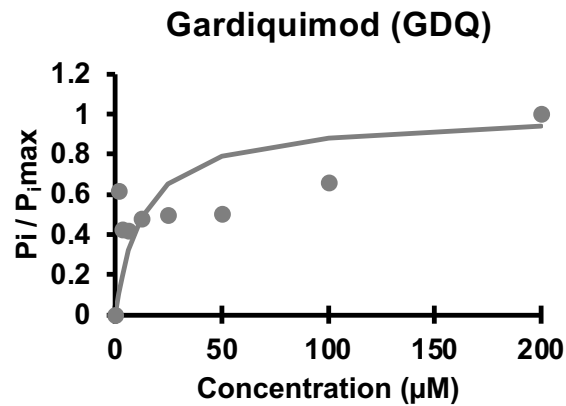

● Exp. — Calculated

**Verapamil (VER) and Tariquidar (TQR) compete with Rhodamine 123 (Rh123) in all cancer cells, leading to more accumulation in MDR cancer cell lines at 37 °C**

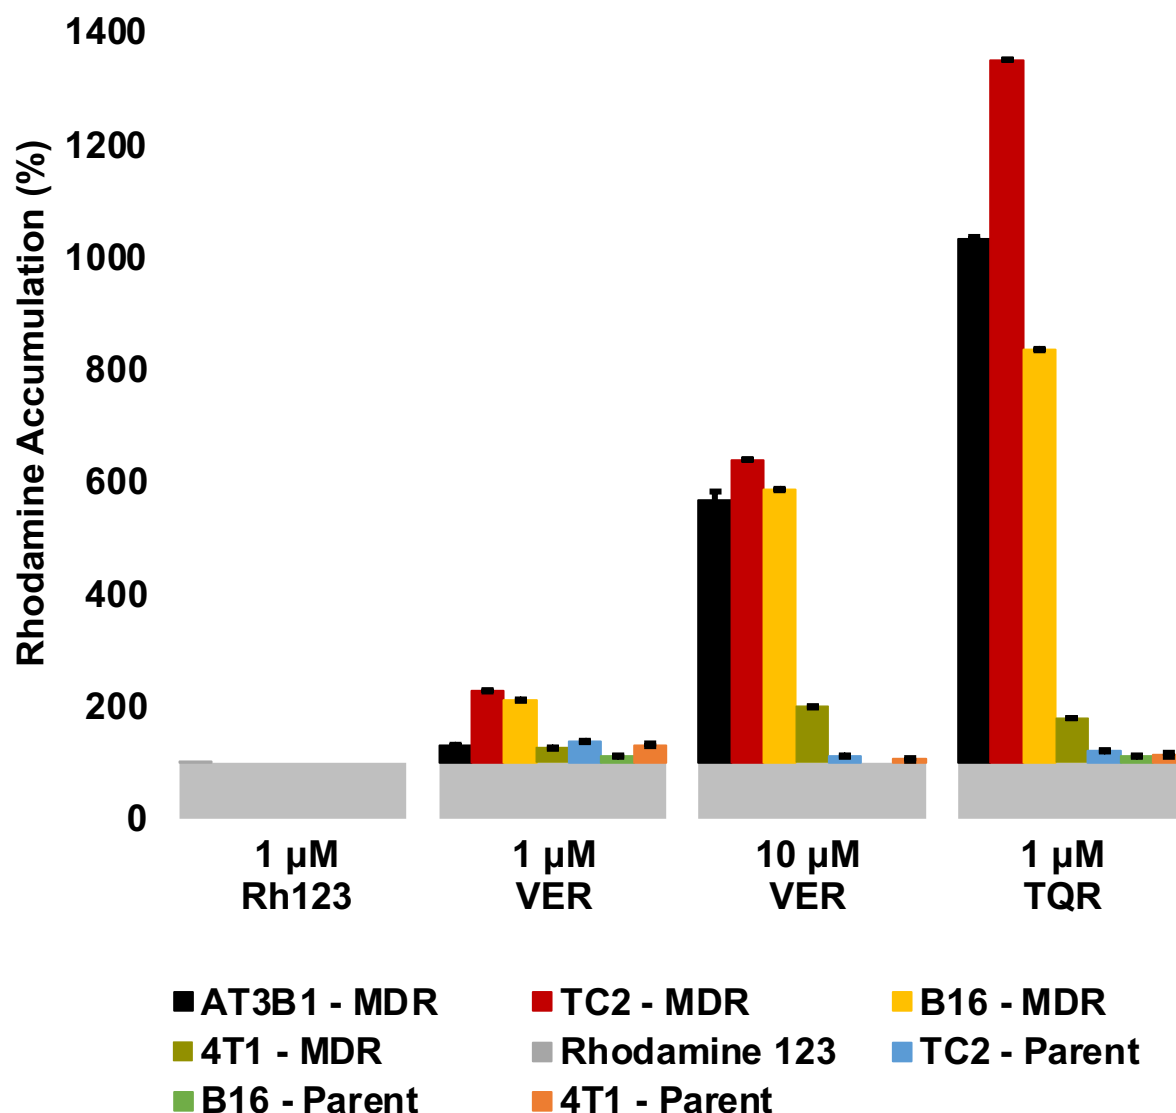

**Figure S1:** Competitive experiments with a known fluorescent substrate of P-gp, Rhodamine 123 (Rh123), in the presence of Verapamil (VER), a known competitive substrate and a first-generation inhibitor, and Tariquidar (TQR), a third-generation inhibitor. VER and TQR compete with Rh123 in all of the cell lines tested. However, more Rh123 accumulation is observed in the MDR-derived cancer cell lines as compared to the parent cancer cell lines. Data representative of experiments repeated in triplicate.

**Verapamil (VER) and Tariquidar (TQR) lead to an increased uptake of Rhodamine 123 (Rh123) in MDR-derived cancer cells at 4 °C**

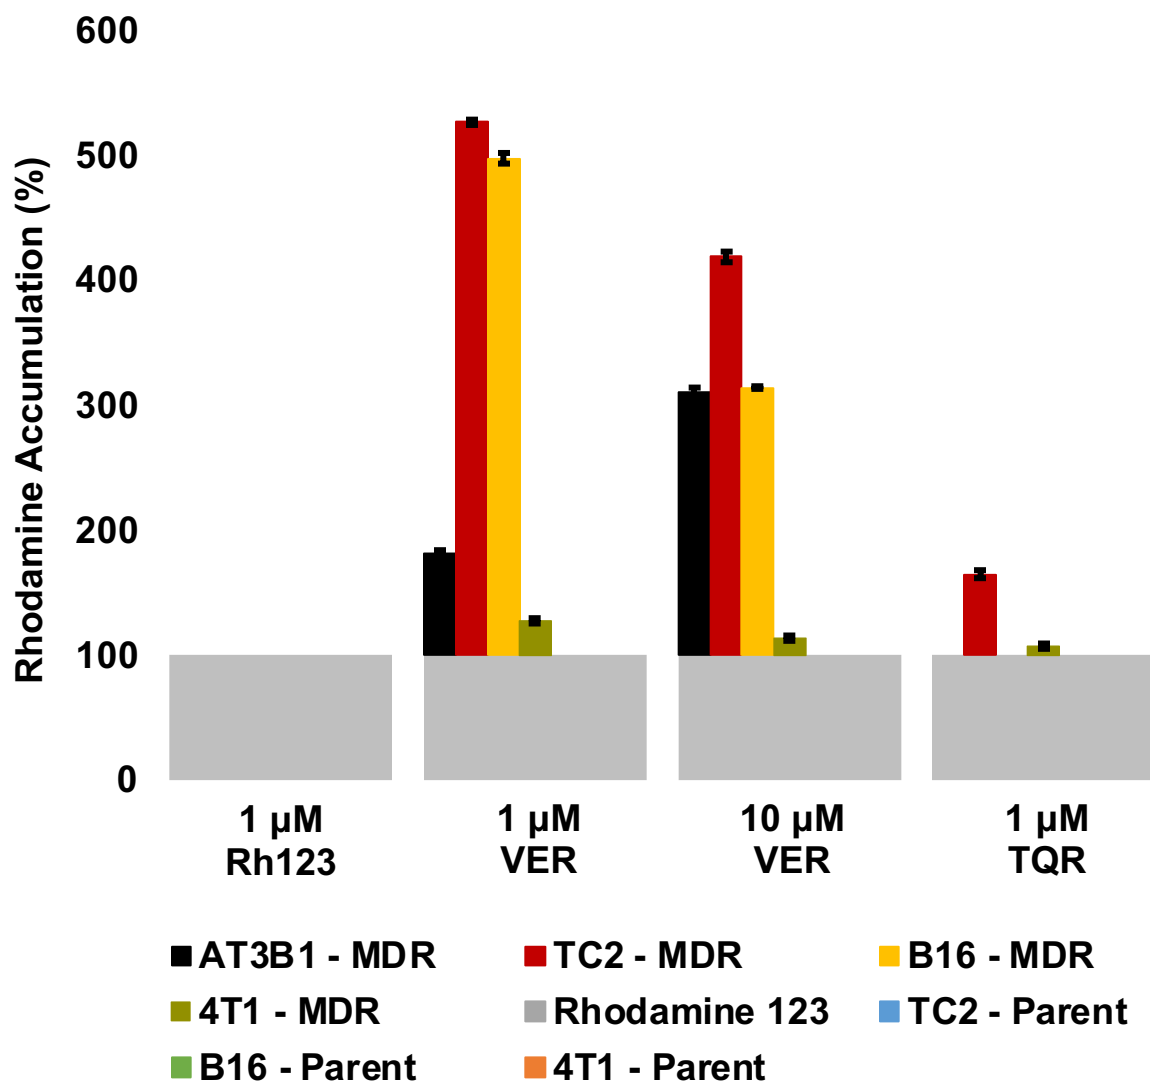

**Figure S2:** Uptake experiments with a known fluorescent substrate of P-gp, Rhodamine 123 (Rh123), in the presence of Verapamil (VER), a known competitive substrate and a first-generation inhibitor, and Tariquidar (TQR), a third-generation inhibitor. VER and TQR lead to an increased uptake of Rh123 under passive diffusion conditions in MDR-derived cancer cell lines. Data representative of experiments repeated in triplicate.



## Imidazoquinolines do not inhibit maximal vanadate-sensitive ATPase activity

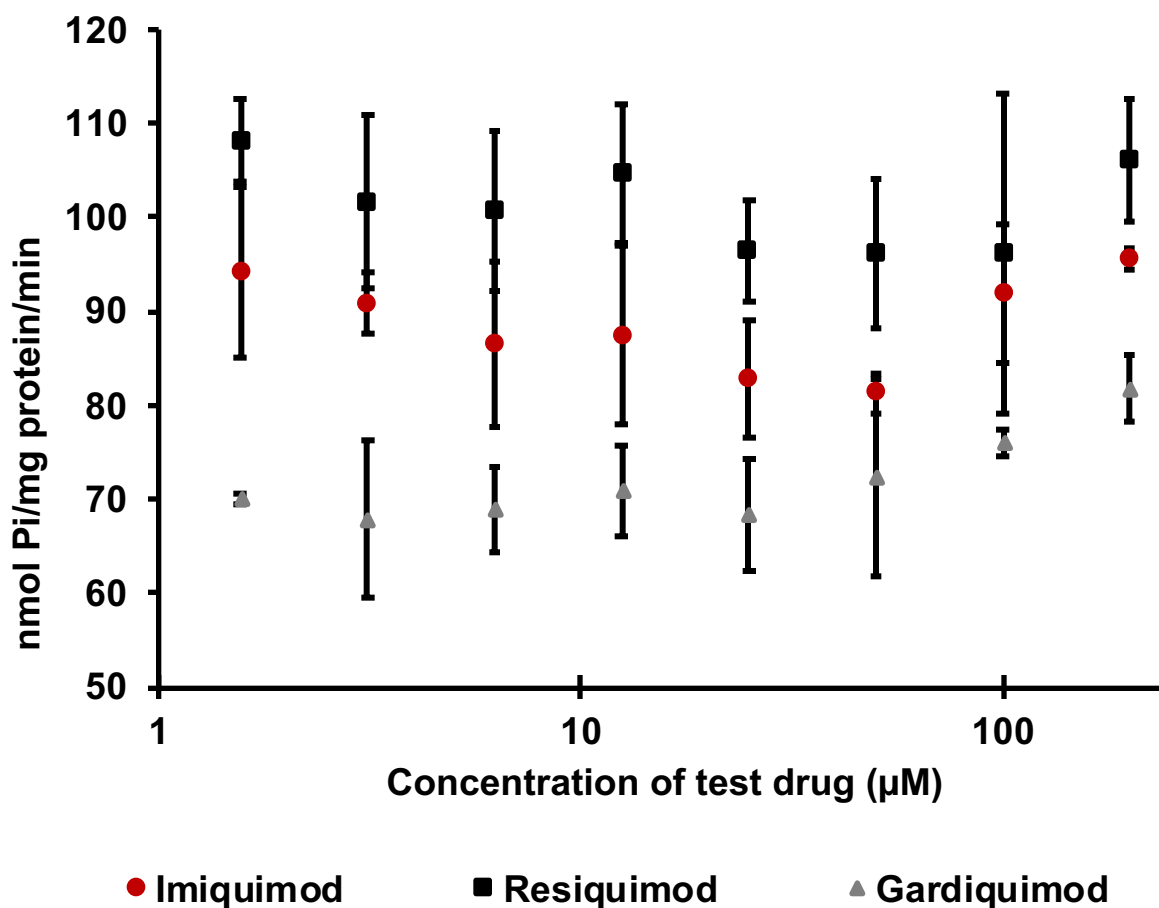

**Figure S3:** IMQ, RSQ, and GDQ do not inhibit maximal vanadate-sensitive ATPase activity in the inhibition test, a complementary test from the ATPase assay. As per manufacturer's instructions, the inhibition test is carried out in the presence a known strong activator of the transporter. Slowly transported compounds may inhibit maximal vanadate-sensitive ATPase activity and interactions detected indicate the interaction of the test compound with the transporter, but do not give information on the nature (substrate or inhibitor) of the interaction.

## Imidazoquinolines are not cytotoxic to the cancer cells at loading concentrations

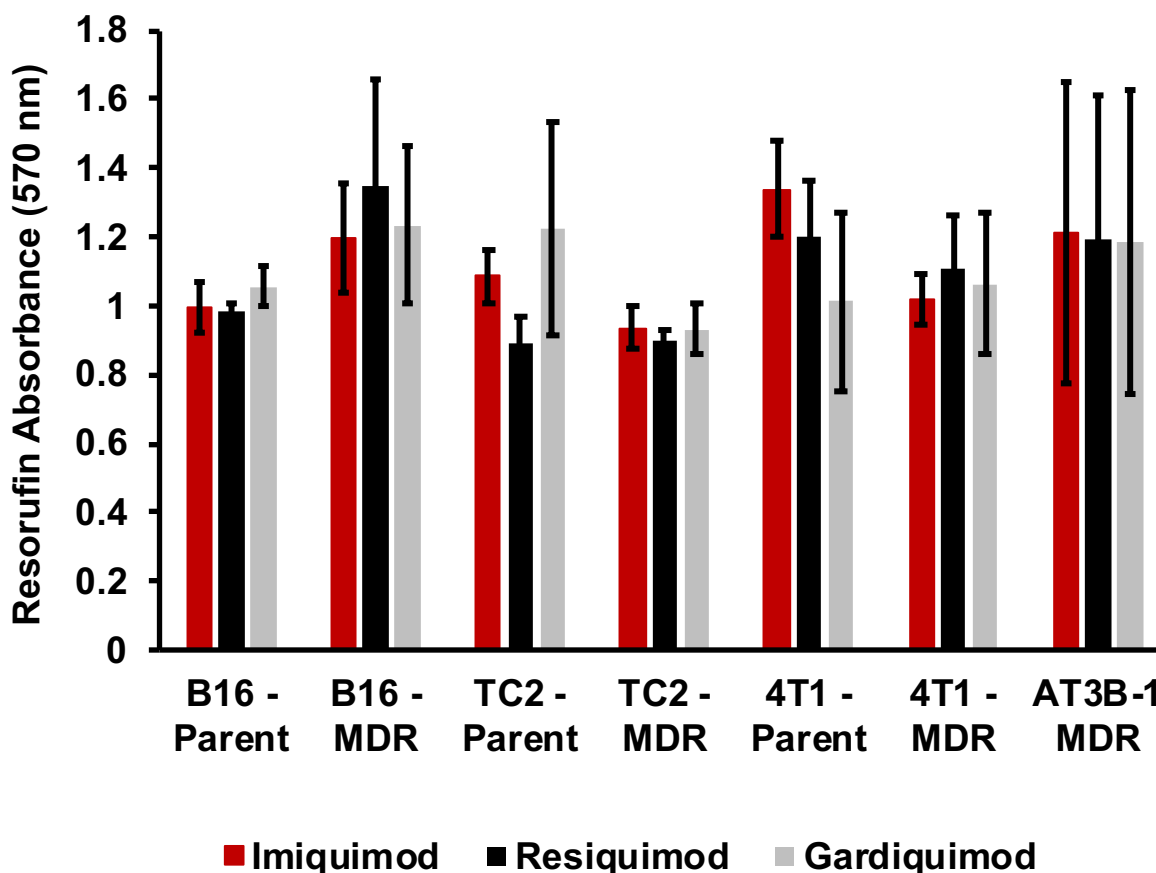

**Figure S4:** Resazurin Cell Viability Assay kit (Abcam - ab129732) was used to determine if the concentrations of imidazoquinolines used in experiments were cytotoxic to the cell lines tested: B16, B16 MDR, TC2, TC2 MDR, 4T1, 4T1 MDR, and AT3B1. Cells were treated with 20 $\mu$ L of 1 mM solutions of imidazoquinoline in 5% DMSO in PBS to give a final concentration per well of 100  $\mu$ M for each compound. The absorbance measurements at 600 nm, which correlate to the absorbance of resazurin, were subtracted from those taken at 570 nm, correlating to the resorufin absorbance. After this, the appropriate blanks were subtracted, giving a resulting absorbance measurement that correlated directly to the number of cells in each well. The data shown here represents a density of 50,000 cells/well with a 3h incubation time with stain.

## Mean fluorescence intensities of competitive experiments with Rhodamine 123 at 37 °C

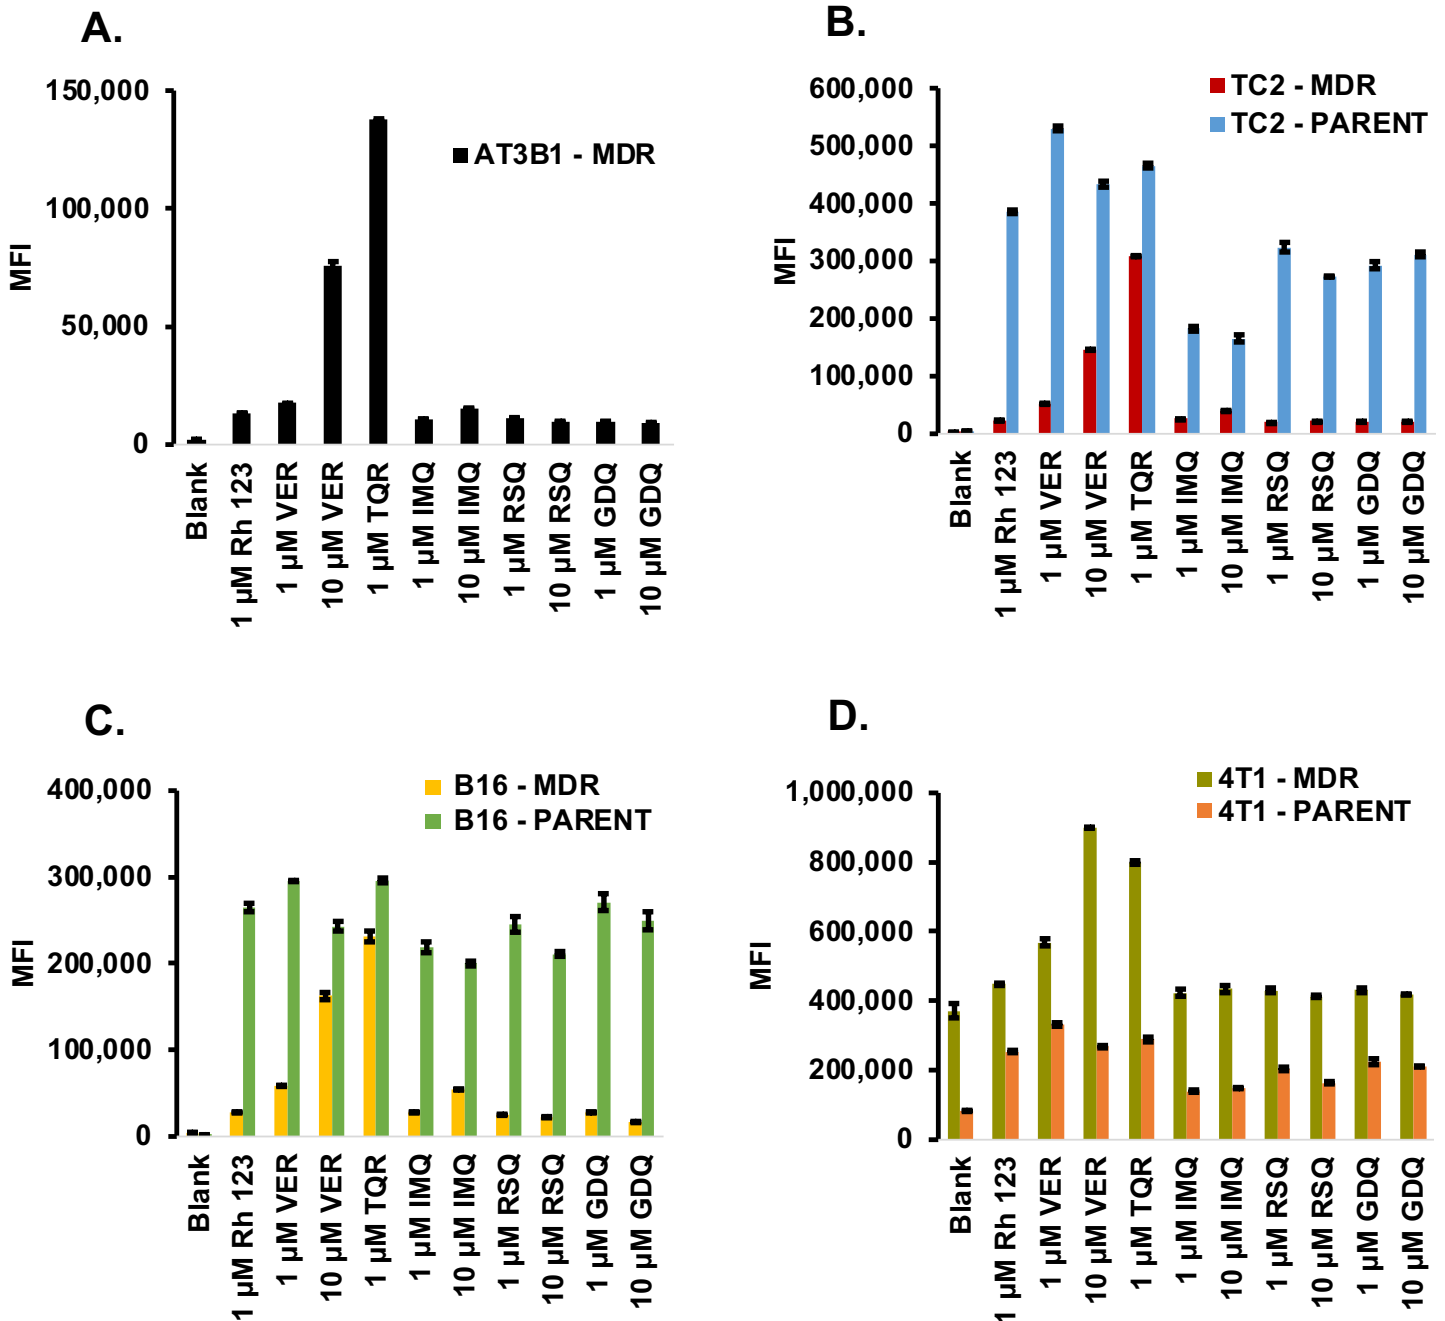

**Figure S5:** Raw Mean Fluorescence Intensities (MFI) acquired via FITC filter from the competitive experiments performed in the presence of Rhodamine 123 (Rh123). **A)** AT3B1 – MDR MFI. **B)** TC2 – MDR vs. TC2 – Parent MFI. **C)** B16 – MDR vs. B16 Parent MFI. **D)** 4T1 – MDR vs. 4T1 – Parent MFI.

## Mean fluorescence intensities of uptake experiments with Rhodamine 123 at 4 °C

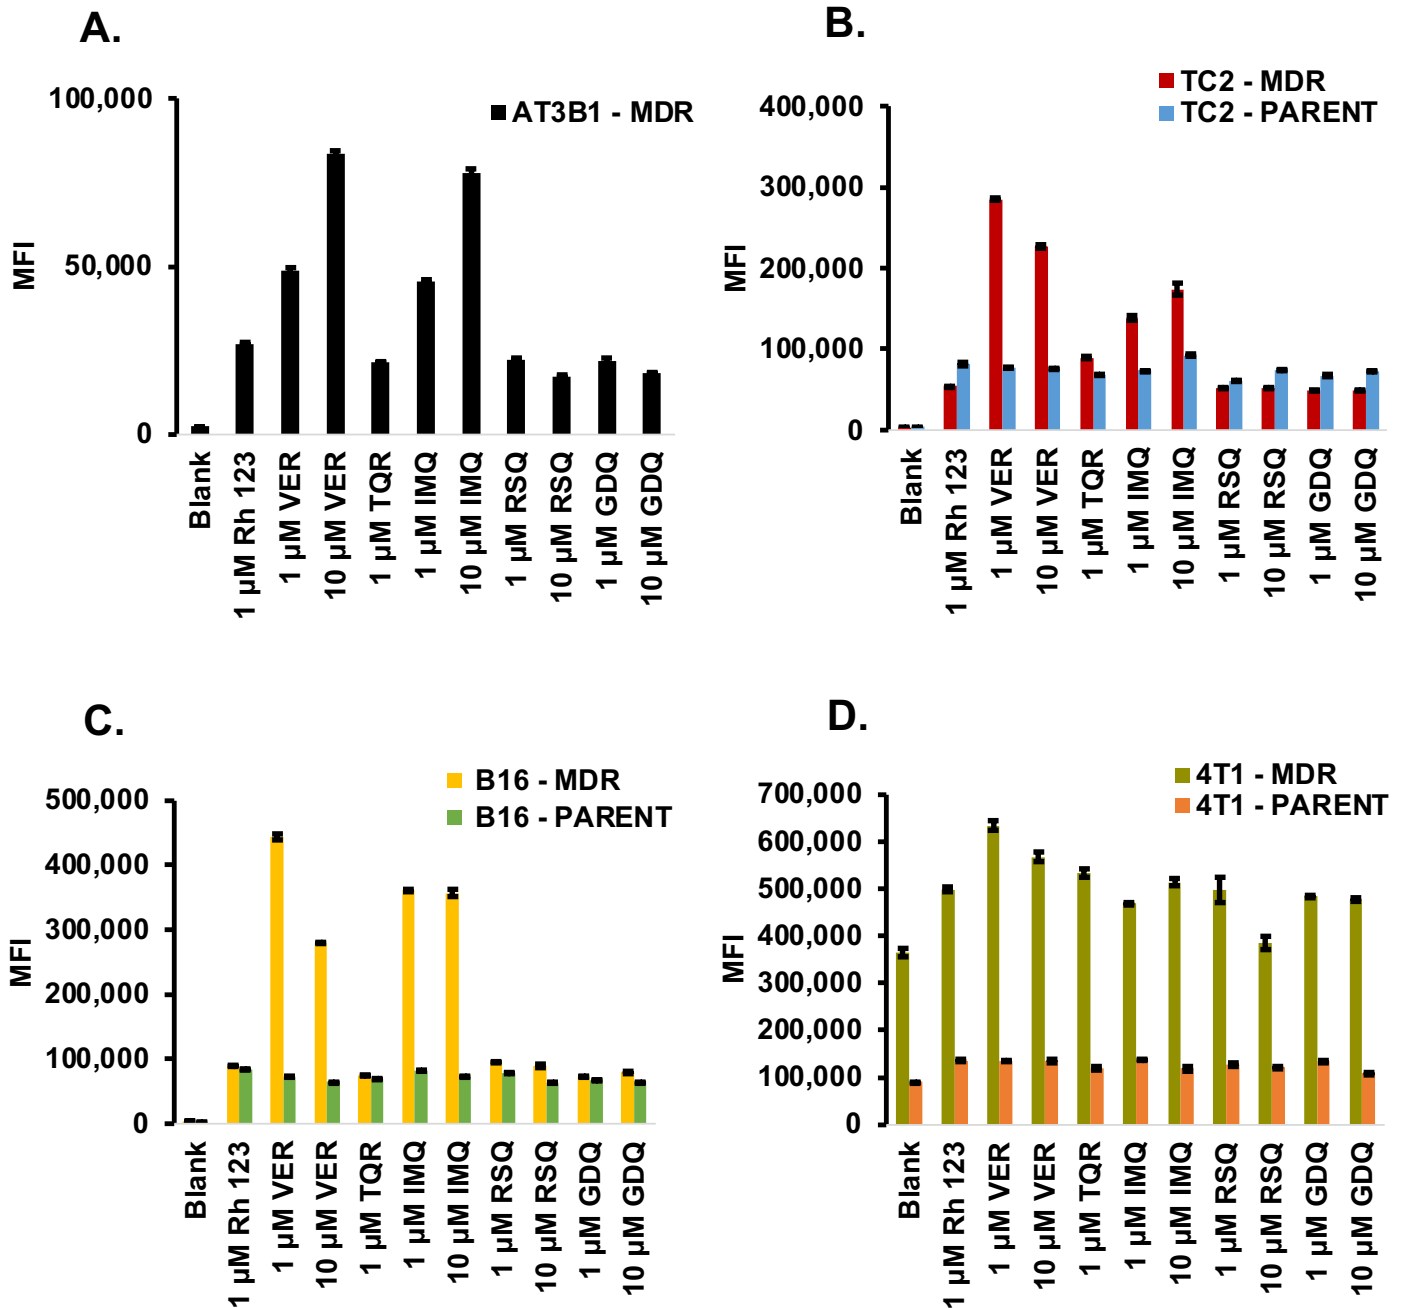

**Figure S6:** Raw Mean Fluorescence Intensities (MFI) acquired via FITC filter from the uptake experiments performed in the presence of Rhodamine 123 (Rh123). **A)** AT3B1 – MDR MFIs. **B)** TC2 – MDR vs. TC2 – Parent MFIs. **C)** B16 – MDR vs. B16 Parent MFIs. **D)** 4T1 – MDR vs. 4T1 – Parent MFIs.

### Quantification of P-gp in cancer cell lines via western blot

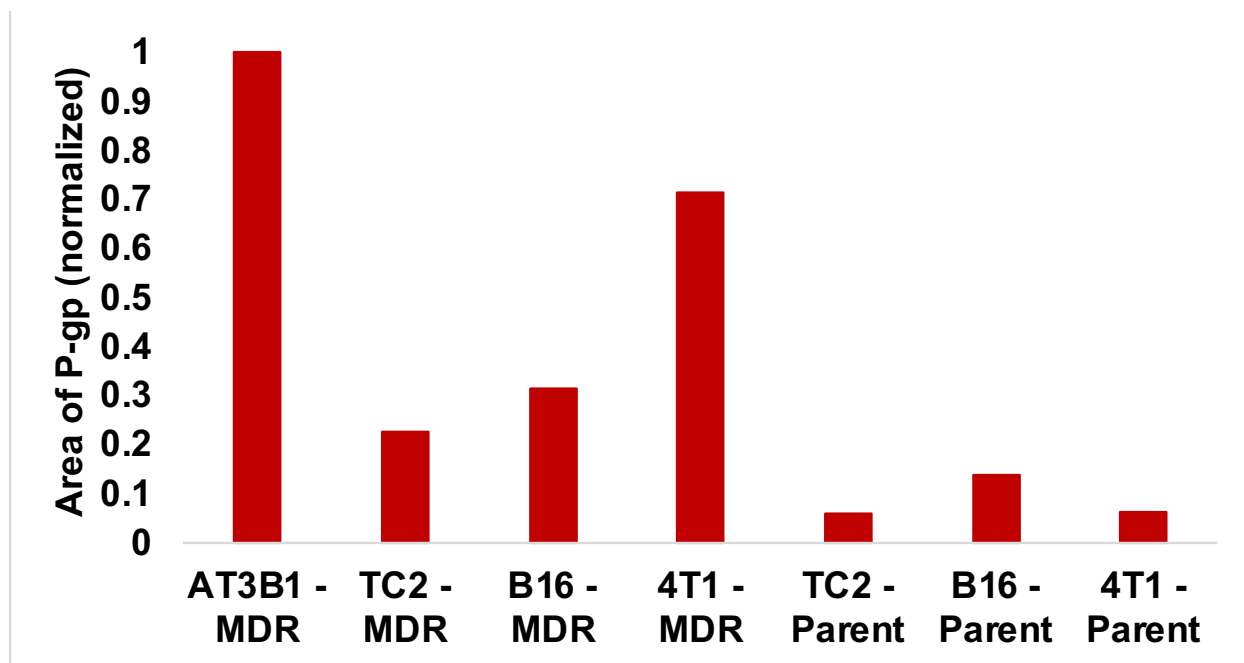

**Figure S7:** Area of P-gp in MDR-derived vs. Parent cancer cell lines as per our western blot normalized to the value of AT3B-1 MDR cancer cells (P-gp positive control), and  $\beta$ -actin (loading control).

# **Progression of TRAMP C2 MDR derived cancer cell line from TRAMP C2 Parent cancer cell line**

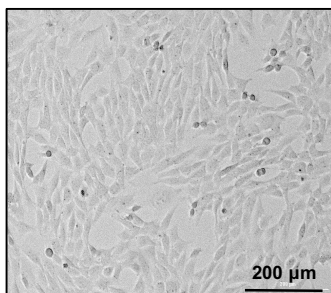

**Parent TRAMP C2**

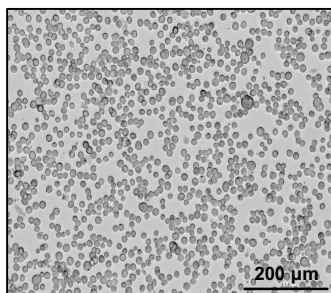

**4 nM Doxorubicin**

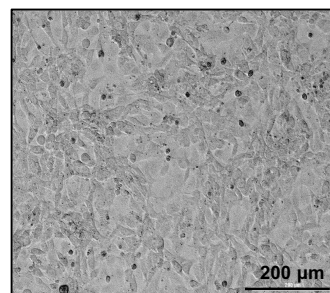

**8 nM Doxorubicin**

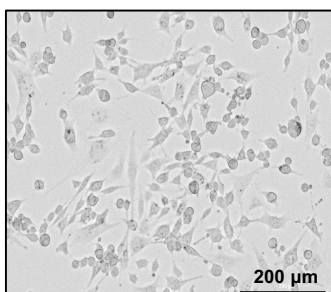

**16 nM Doxorubicin**

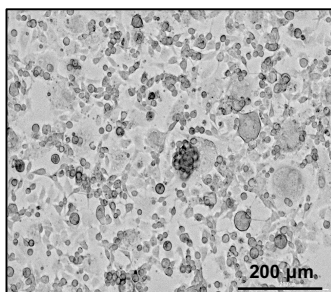

**32 nM Doxorubicin**

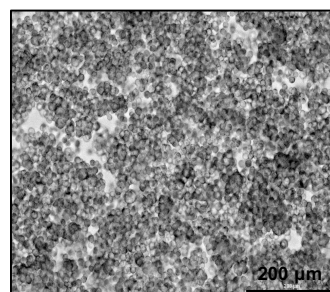

**64 nM Doxorubicin**

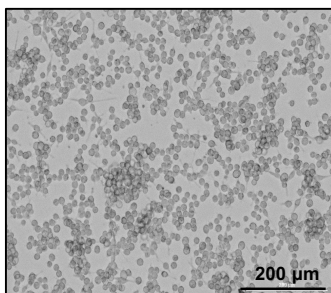

**128 nM Doxorubicin**

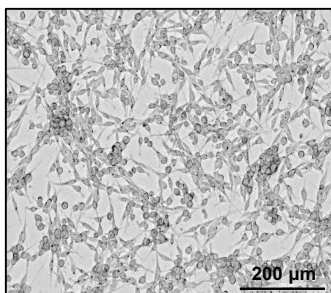

**256 nM Doxorubicin**

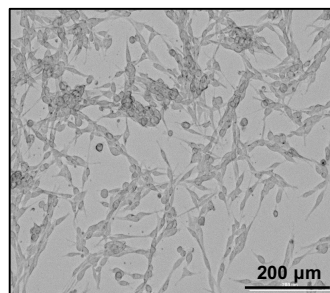

**500 nM Doxorubicin**

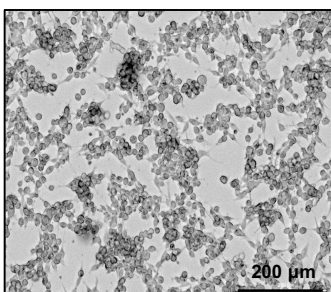

**1 μM Doxorubicin**

## Progression of B16 MDR derived cancer cell line from B16 Parent cancer cell line

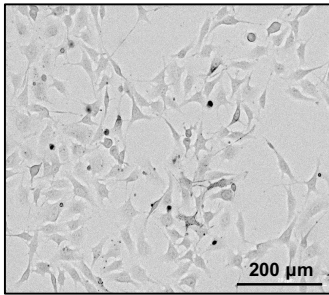

**Parent B16**

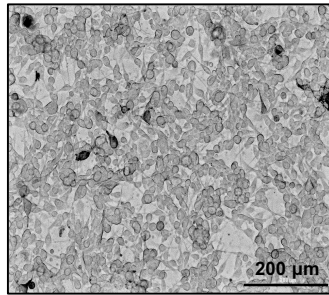

**4 nM Doxorubicin**

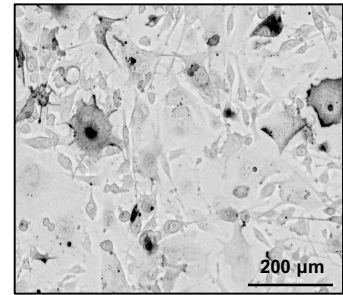

**8 nM Doxorubicin**

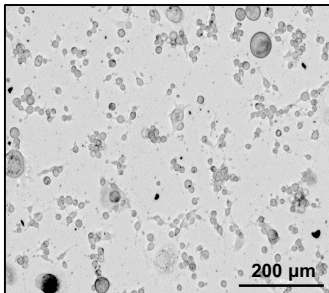

**16 nM Doxorubicin**

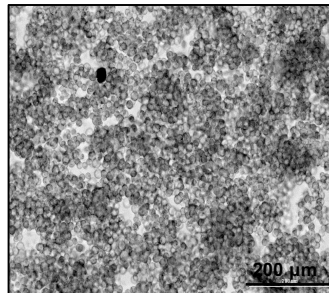

**32 nM Doxorubicin**

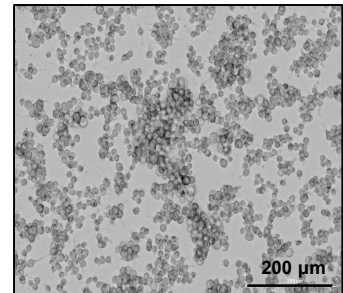

**64 nM Doxorubicin**

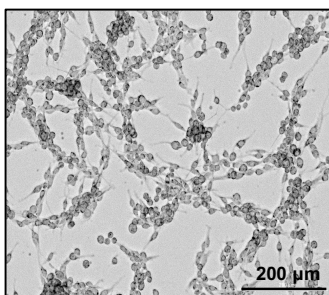

**128 nM Doxorubicin**

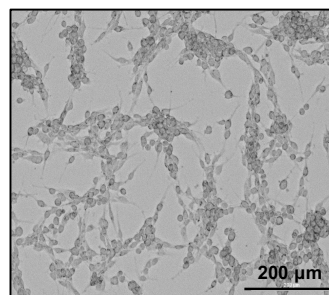

**256 nM Doxorubicin**

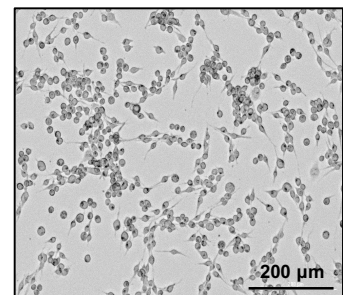

**500 nM Doxorubicin**

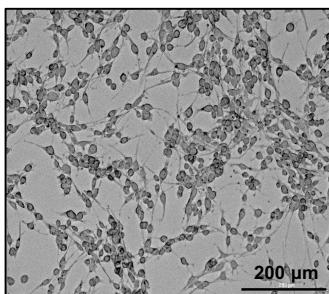

**1 μM Doxorubicin**

## Progression of 4T1 MDR derived cancer cell line from 4T1 Parent cancer cell line

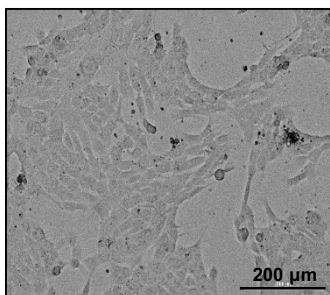

**Parent 4T1**

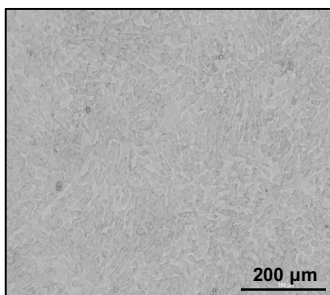

**4 nM Doxorubicin**

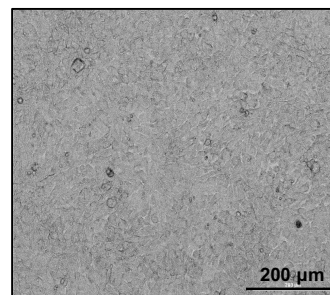

**8 nM Doxorubicin**

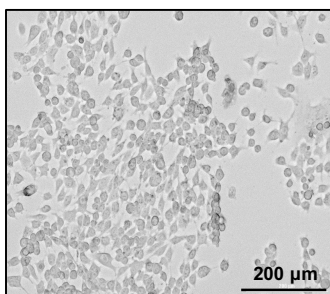

**16 nM Doxorubicin**

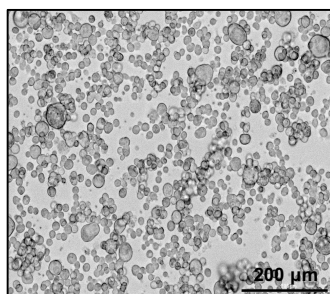

**32 nM Doxorubicin**

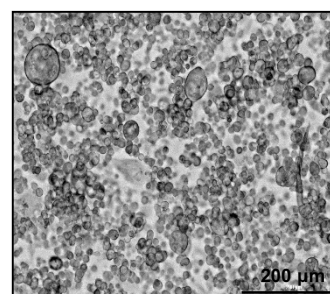

**64 nM Doxorubicin**

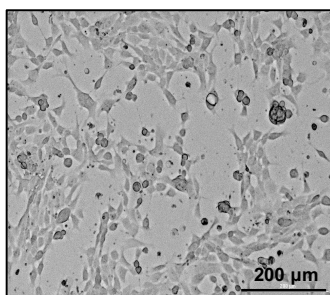

**128 nM Doxorubicin**

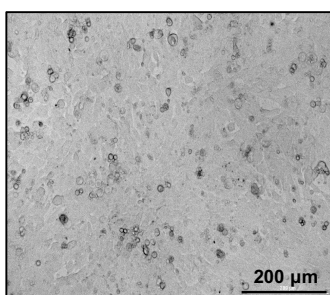

**256 nM Doxorubicin**

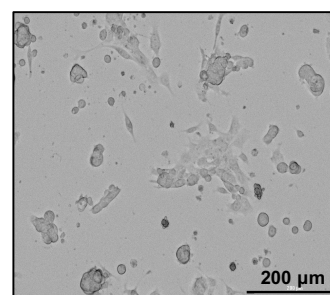

**500 nM Doxorubicin**

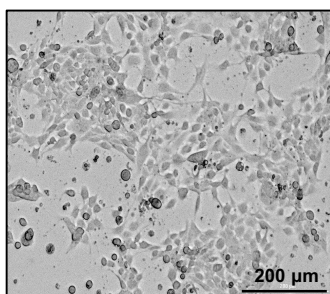

**1 μM Doxorubicin**



## Flow cytometry histograms: competitive experiments with Rhodamine 123

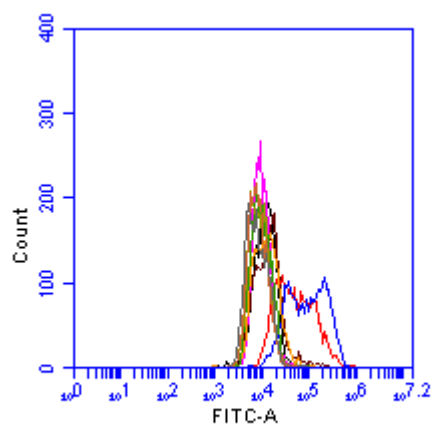

**AT3B1 - MDR**

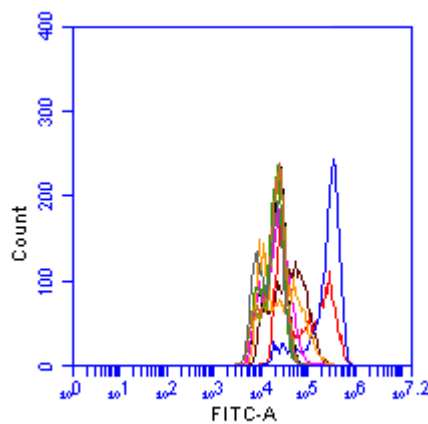

**TC2 - MDR**

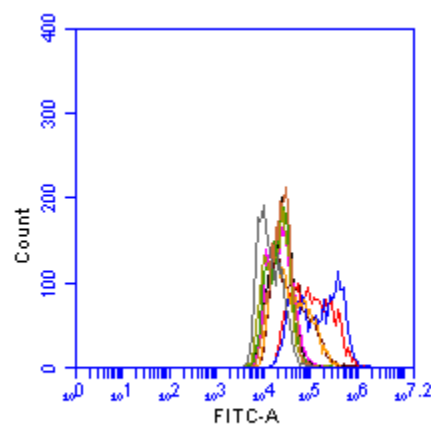

**B16 - MDR**

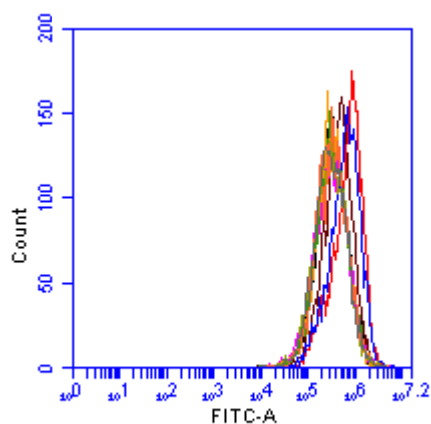

**4T1 - MDR**

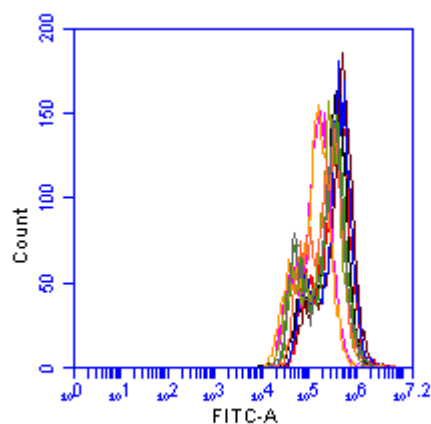

**TC2 - Parent**

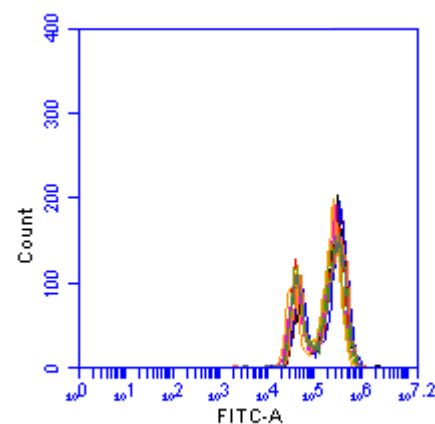

**B16 - Parent**

### Overlay Histogram Legend

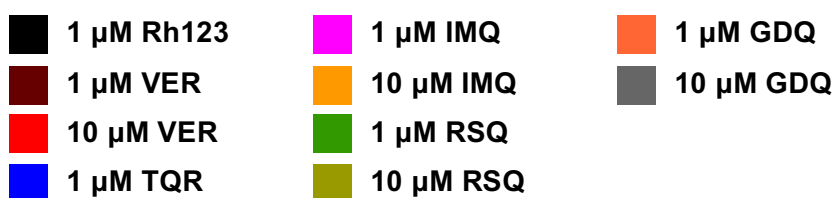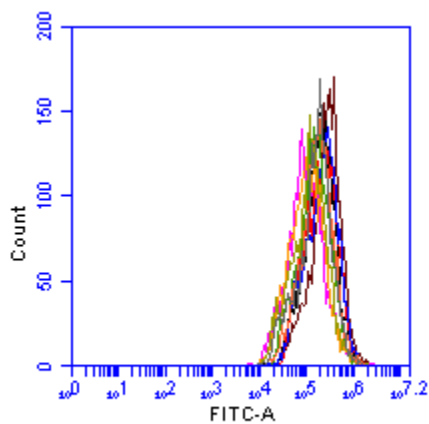

**4T1 - Parent**

## Flow cytometry histograms: uptake experiments with Rhodamine 123

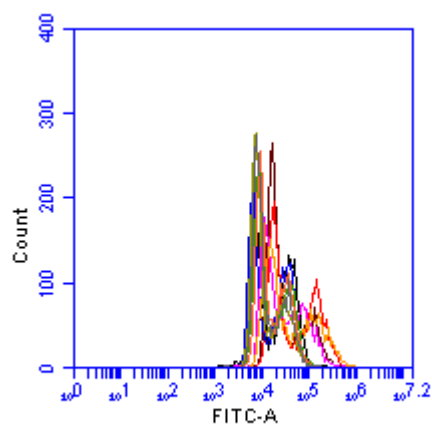

**AT3B1 - MDR**

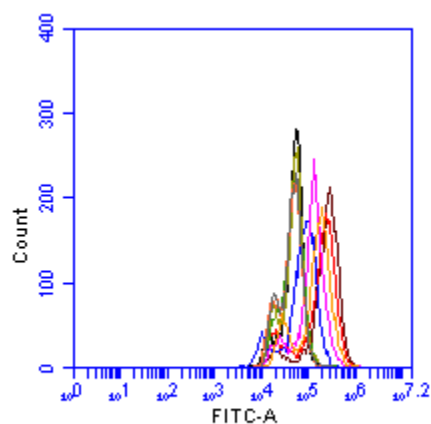

**TC2 - MDR**

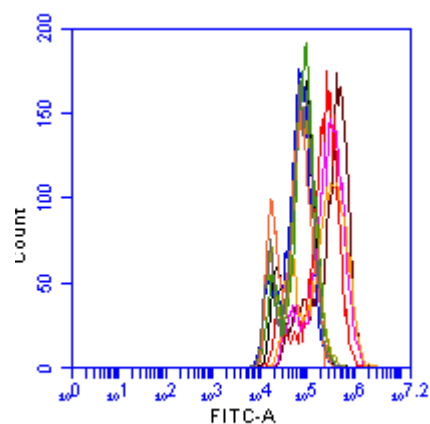

**B16 - MDR**

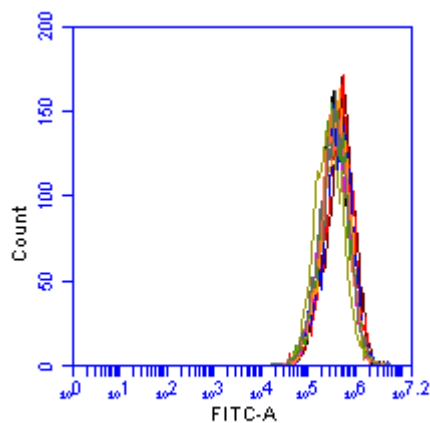

**4T1 - MDR**

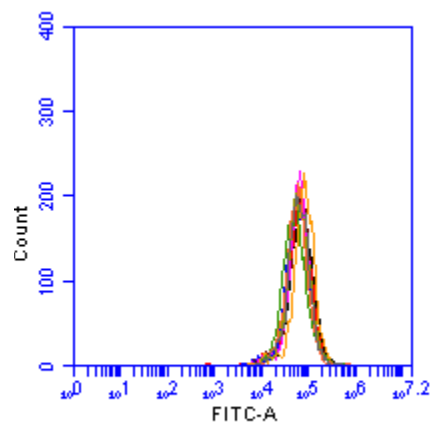

**TC2 - Parent**

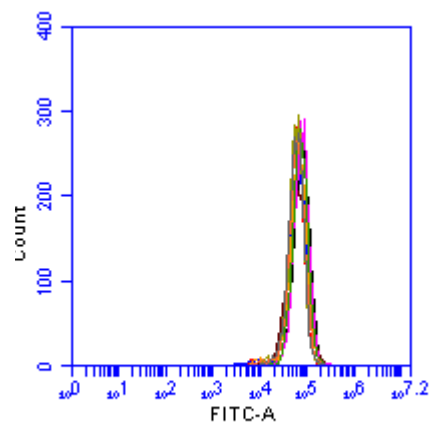

**B16 - Parent**

### Overlay Histogram Legend

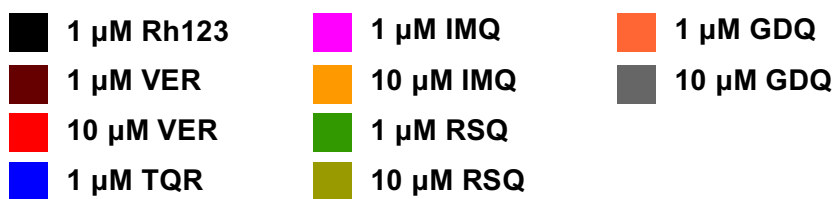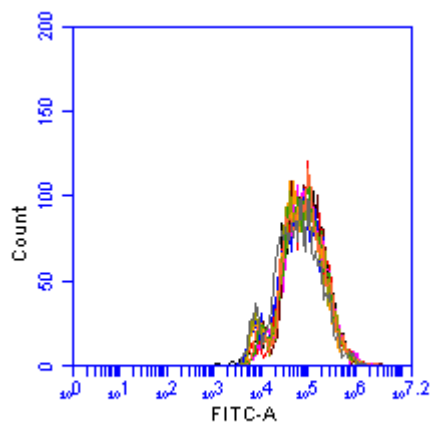

**4T1 - Parent**

## Synthetic procedure for Gardiquimod

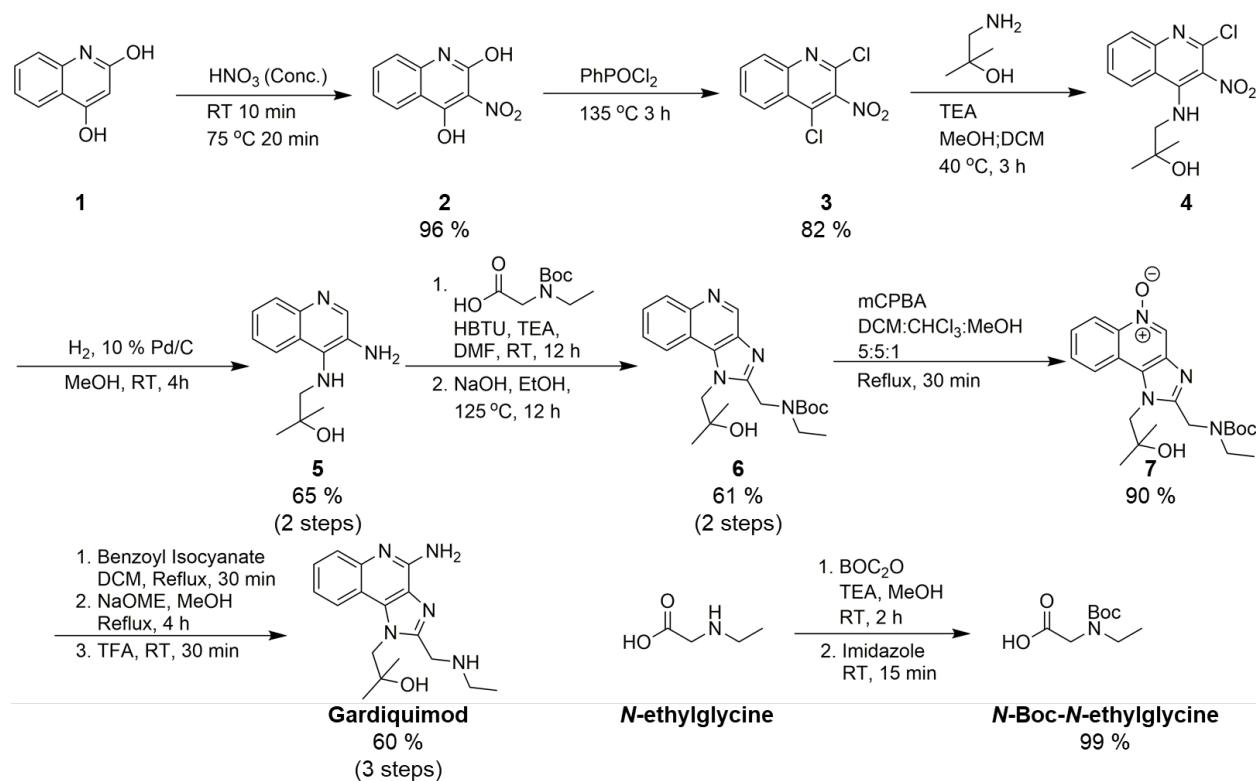

**Scheme 1:** Synthetic route used to prepare Gardiquimod in 17% linear yield from 2,4-dihydroxyquinoline.

The synthetic route used to synthesize Gardiquimod was adapted from the methods reported by Taguchi [1], compounds (**4** and **5**), Gerster [2] compounds (**3**), and David [3,4] compounds (**2**, **6**, **7**, and Gardiquimod). 2,4-dihydroxyquinoline (**1**) was chosen as an inexpensive and readily available starting material. 2,4-dihydroxyquinoline (**1**) is nitrated in neat concentrated nitric acid (A.C.S. Grade) to yield 2,4-dihydroxy-3-nitroquinoline (**2**) which can be precipitated in ice cold H<sub>2</sub>O. Compound (**2**) is then heated in neat phenylphosphonic dichloride at 135 °C to yield 2,4-dichloro-3-nitroquinoline (**3**) which can be recovered following precipitation in ice cold H<sub>2</sub>O, trituration in benzene, and lyophilization of the organic filtrate. Compound (**3**) undergoes nucleophilic aromatic substitution under basic conditions with 1-amino-2-methylpropan-2-ol to yield the secondary amine (**4**). Although the reaction preferentially occurs at the 4 position, an amount of diamine from displacement of both chlorides also occurs, but can be separated from (**4**) by recrystallization in benzene.

At this point the nitro group is reduced by hydrogenation. The 2-chloro substituent is reduced with palladium catalyst and diamine (**5**) is obtained in good purity following removal of catalyst and evaporation of solvent. *N*-Boc-*N*-ethylglycine is activated with HBTU and reacted with diamine (**5**), after 12 h solvent is removed, and the resultant amide refluxed under basic conditions to aromatize the system to accomplish the Traube

reaction yielding imidazoquinoline (**6**) which is purified by column chromatography with isocratic Ethyl acetate with 1% TEA.

To install the aniline on the 4 position, imidazoquinoline (**6**) is oxidized with mCPBA to yield *N*<sup>5</sup>-oxide (**7**). When the *N*-oxide is treated with benzoyl isocyanate in DCM at reflux the benzoyl protected aniline is provided. The benzoyl group is removed via methanolysis to liberate the anilino group and the Boc protecting group is removed with standard trifluoroacetic acid deprotection, and the resultant crude residue freebased with triethylamine and purified via a reverse phase C18 flash column using a gradient of 10 to 90 % acetonitrile in water to yield Gardiquimod in 17% linear yield over 10 steps from 2,4-dihydroxy quinoline.

## Characterization of Gardiquimod

### Gardiquimod

$^1\text{H}$  NMR (600 MHz,  $\text{DMSO}-d_6$ )  $\delta$  8.21 (d,  $J = 8.2$  Hz, 1H; Ar-H), 7.59 (d,  $J = 8.3$  Hz, 1H; Ar-H), 7.39 (t,  $J = 7.6$  Hz, 1H, Ar-H), 7.21 (t,  $J = 7.5$  Hz, 1H, Ar-H), 6.52 (s, 2H;  $\text{NH}_2$ ), 4.70 (s, 2H;  $\text{CH}_2$ ), 4.10 (s, 2H;  $\text{CH}_2$ ), 2.60 (q,  $J = 7.1, 6.5$  Hz, 2H;  $\text{CH}_2$ ), 1.16 (s, 6H; 2  $\text{CH}_3$ ), 1.03 (t,  $J = 7.2$  Hz, 3H;  $\text{CH}_3$ ) ppm;  $^{13}\text{C}$  NMR (151 MHz,  $\text{DMSO}-d_6$ )  $\delta$  = 152.8, 151.9, 145.1, 133.9, 126.3, 126.3, 126.0, 121.0, 120.5, 115.4, 70.2, 55.2, 45.6, 43.1, 27.8, 14.7 ppm; UV/VIS(Acetonitrile):  $\lambda_{\text{Max}}(\epsilon) = 228$  nm (35400),  $\lambda_2(\epsilon) = 247$  nm (34700); IR(ATR): 3301 (br, m), 2984 (m), 1673 (s), 1200 (s), 1131 (s), 721 (w); HRMS(MALDI):  $m/z$  calcd for  $\text{C}_{17}\text{H}_{24}\text{N}_5\text{O}$ : 314.1981  $[\text{M}+\text{H}]^+$ , observed 314.19733. ( $\Delta=2.45$  ppm).

### $^1\text{H}$ NMR Spectra of Gardiquimod

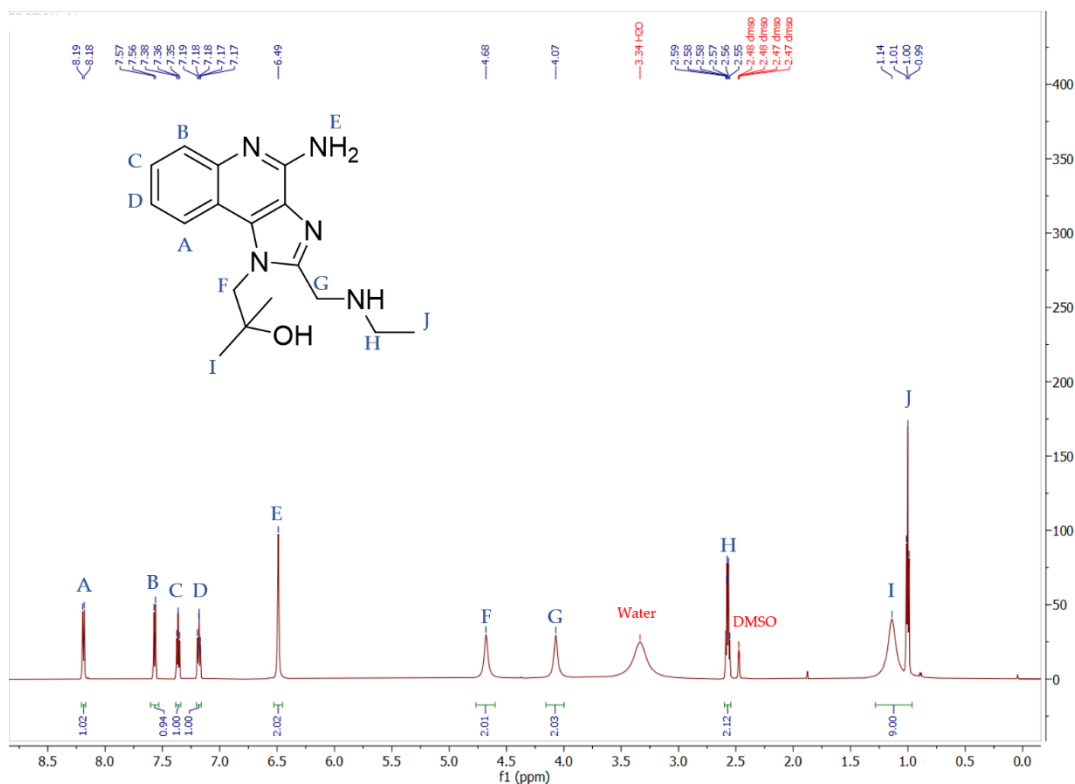

# <sup>13</sup>C Spectra of Gardiquimod

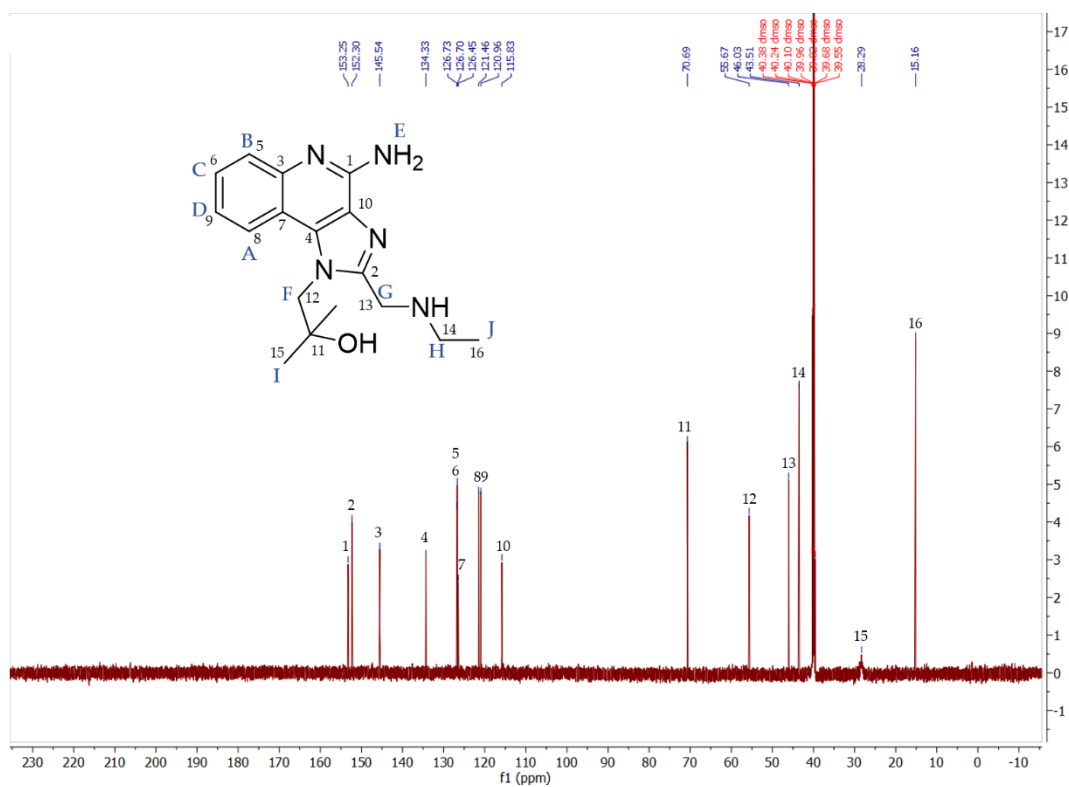

## COSY Spectra of Gardiquimod

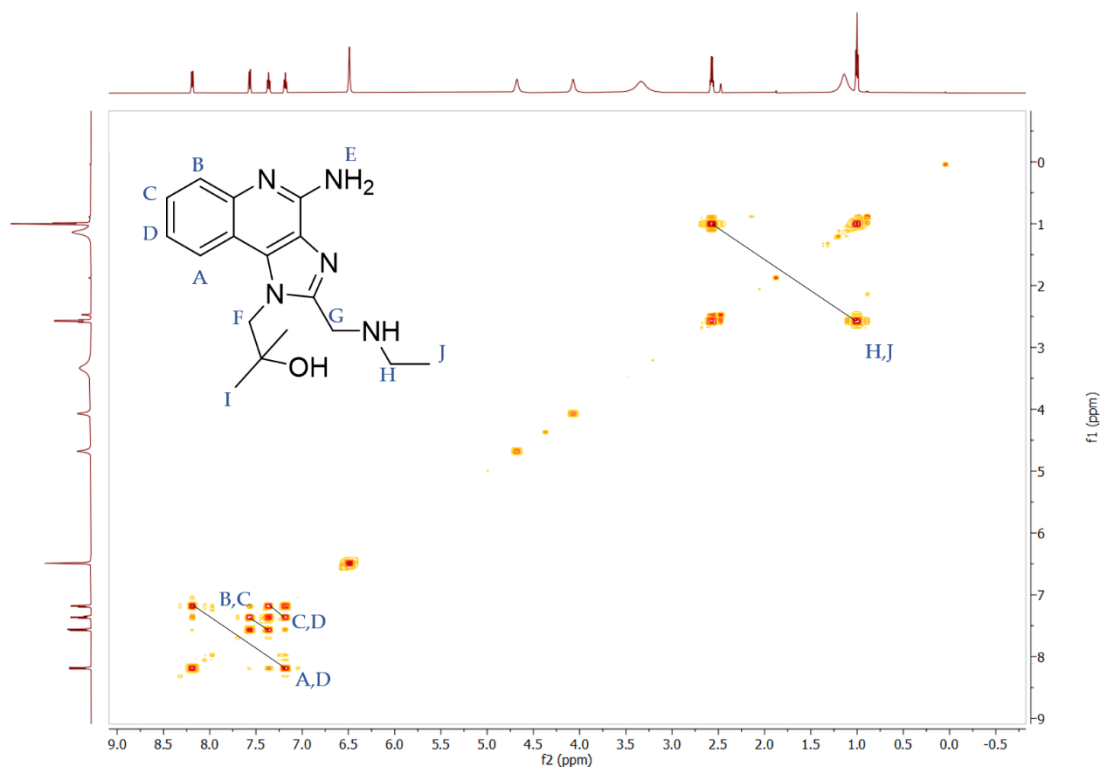

## HSQC Spectra of Gardiquimod

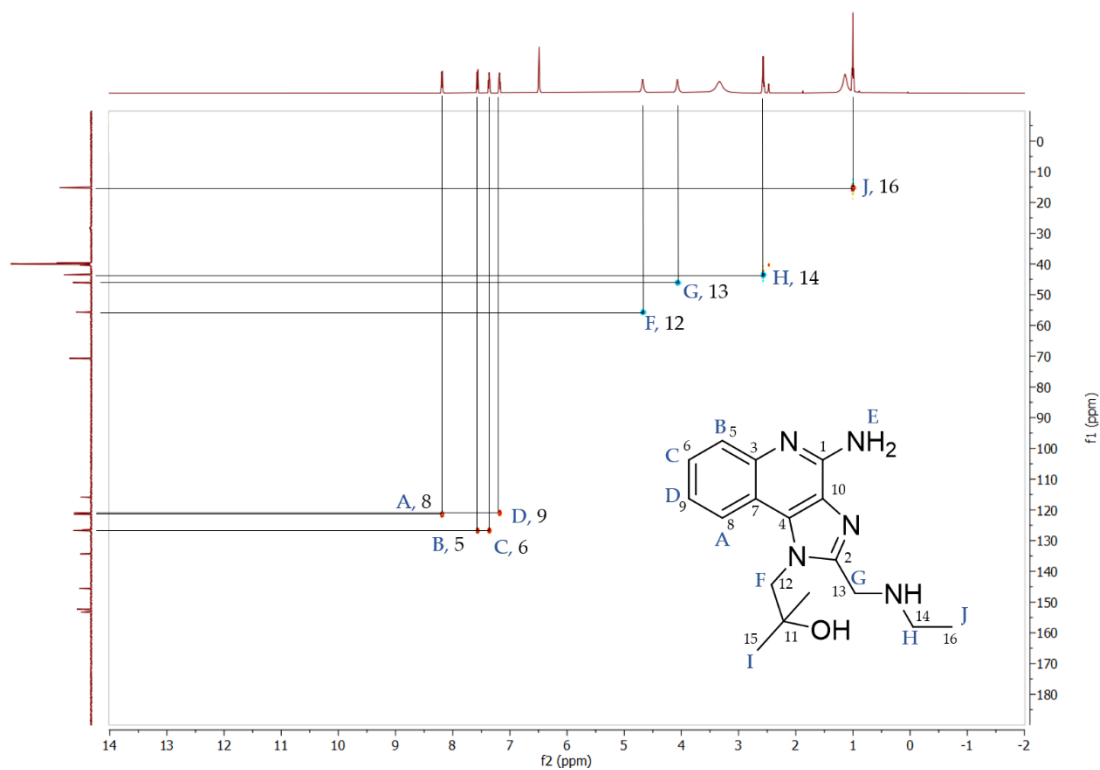

## HSQC with enhanced intensity to show signal for I

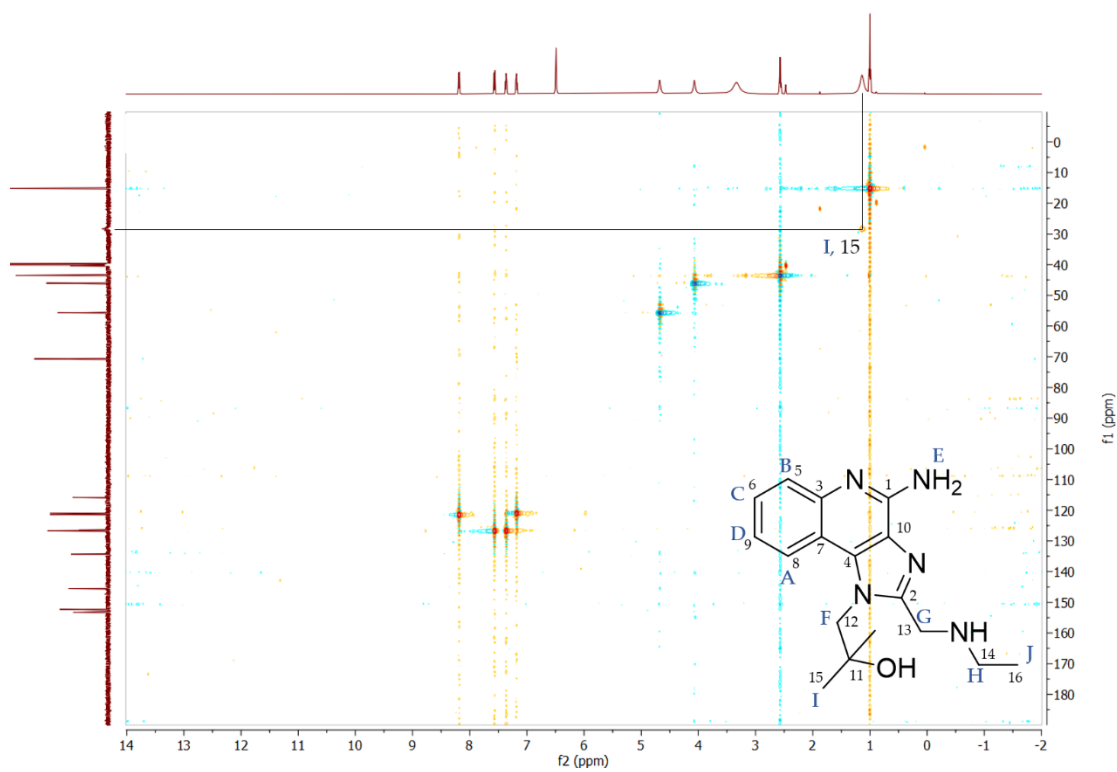

# <sup>1</sup>H NMR Spectra for Numbered Intermediates 2-7

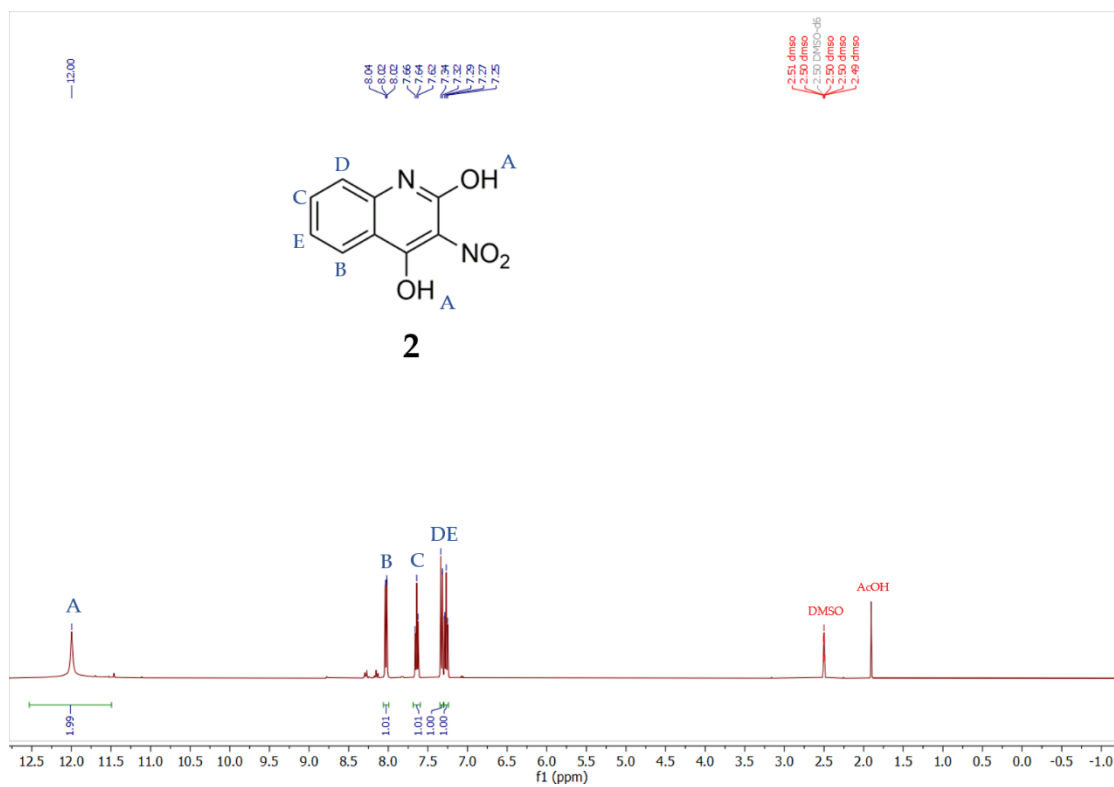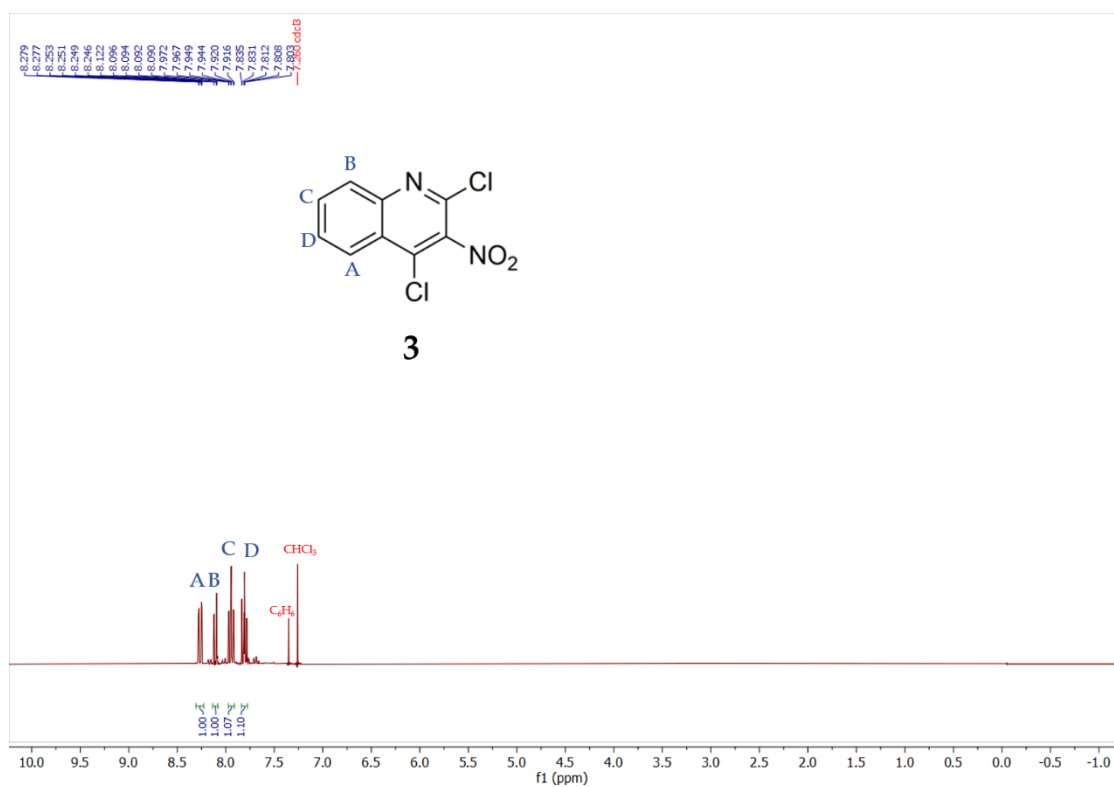



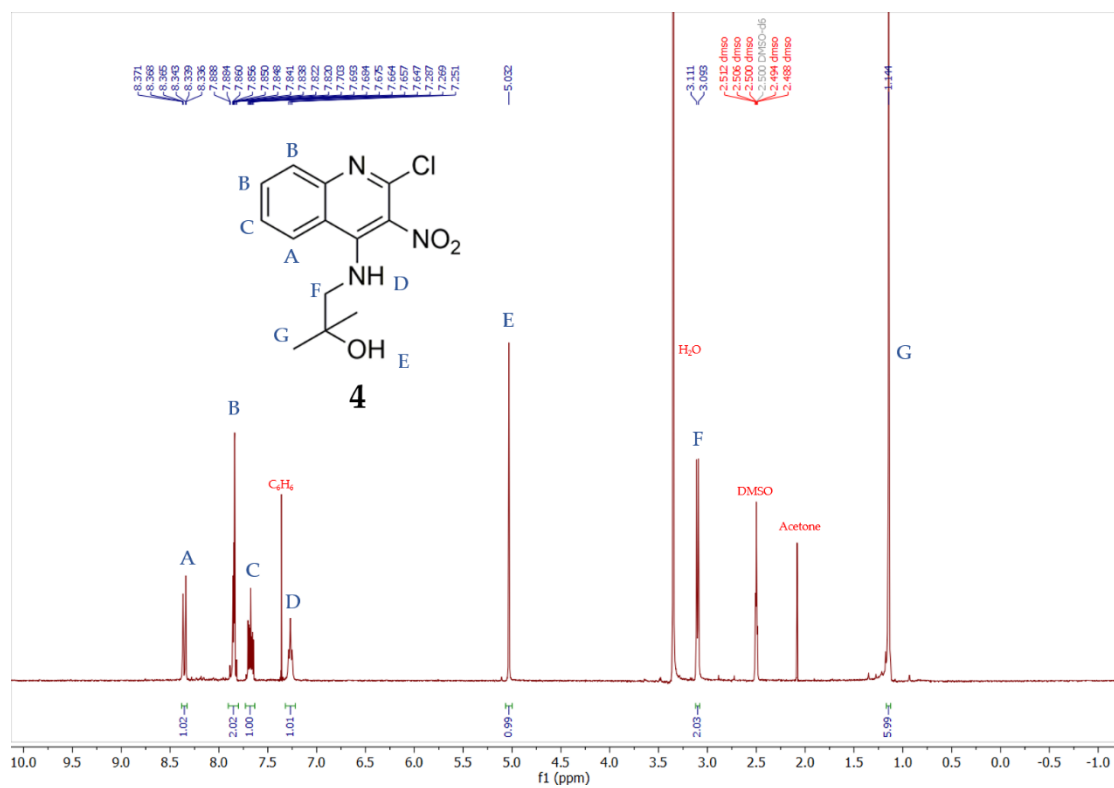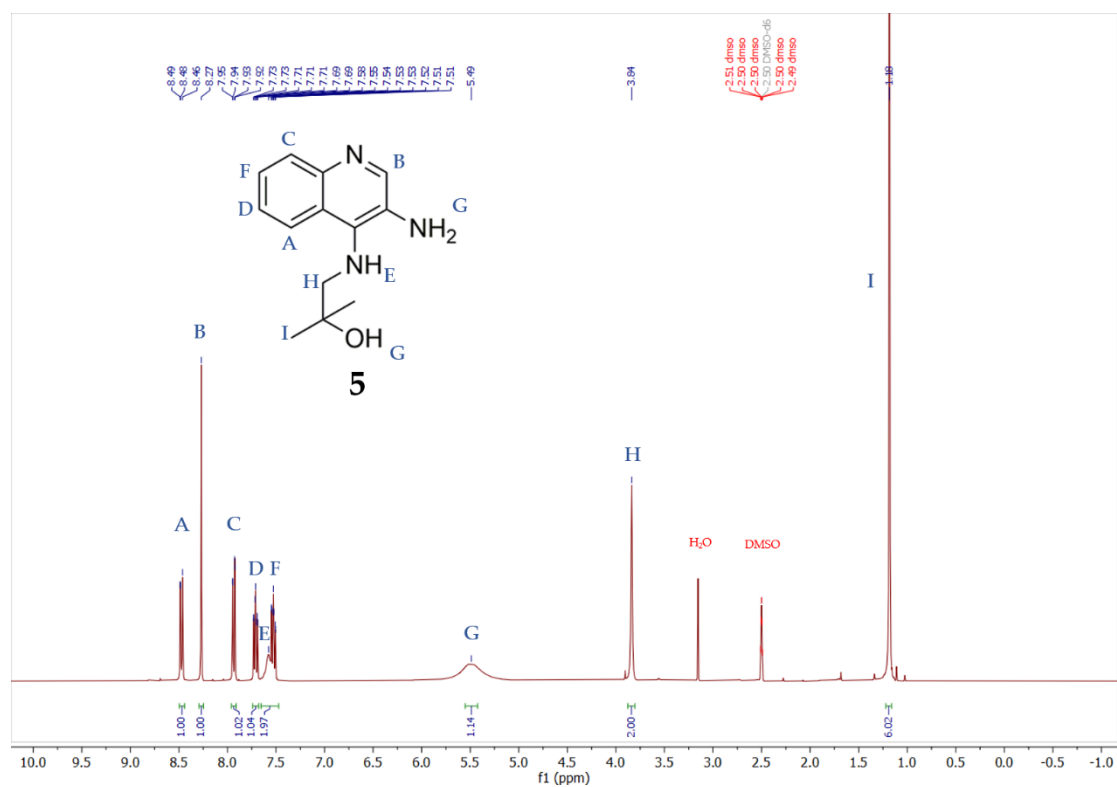

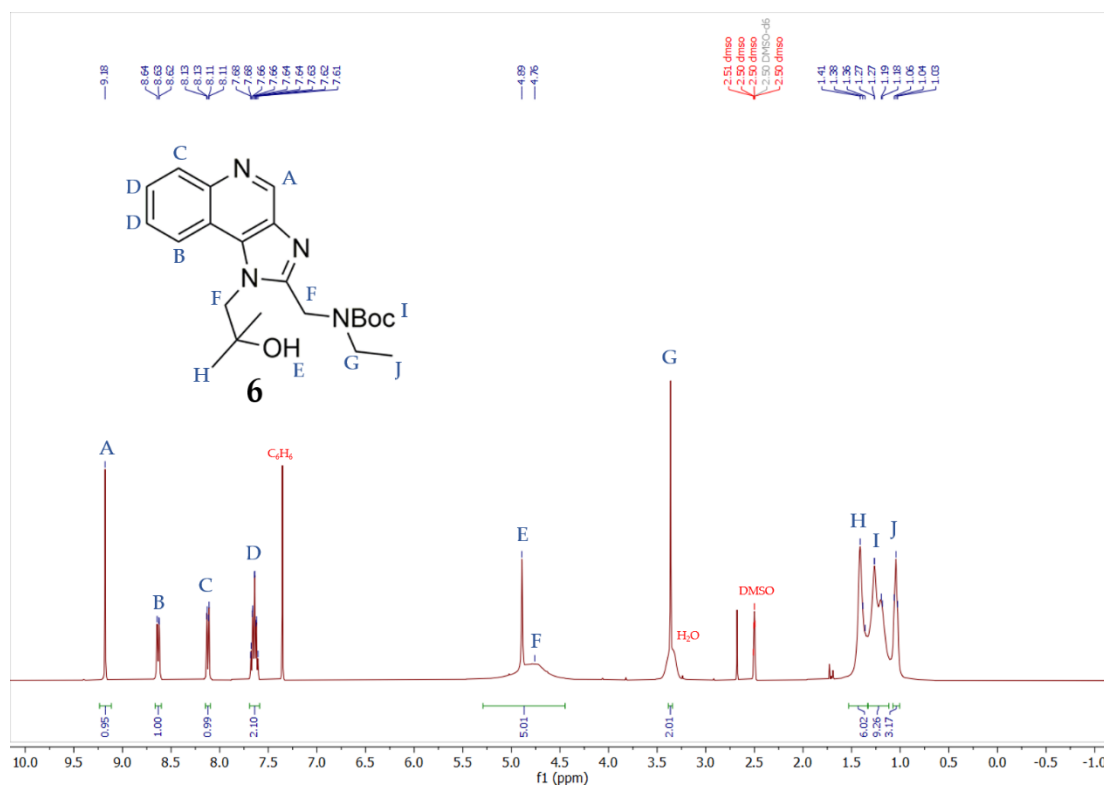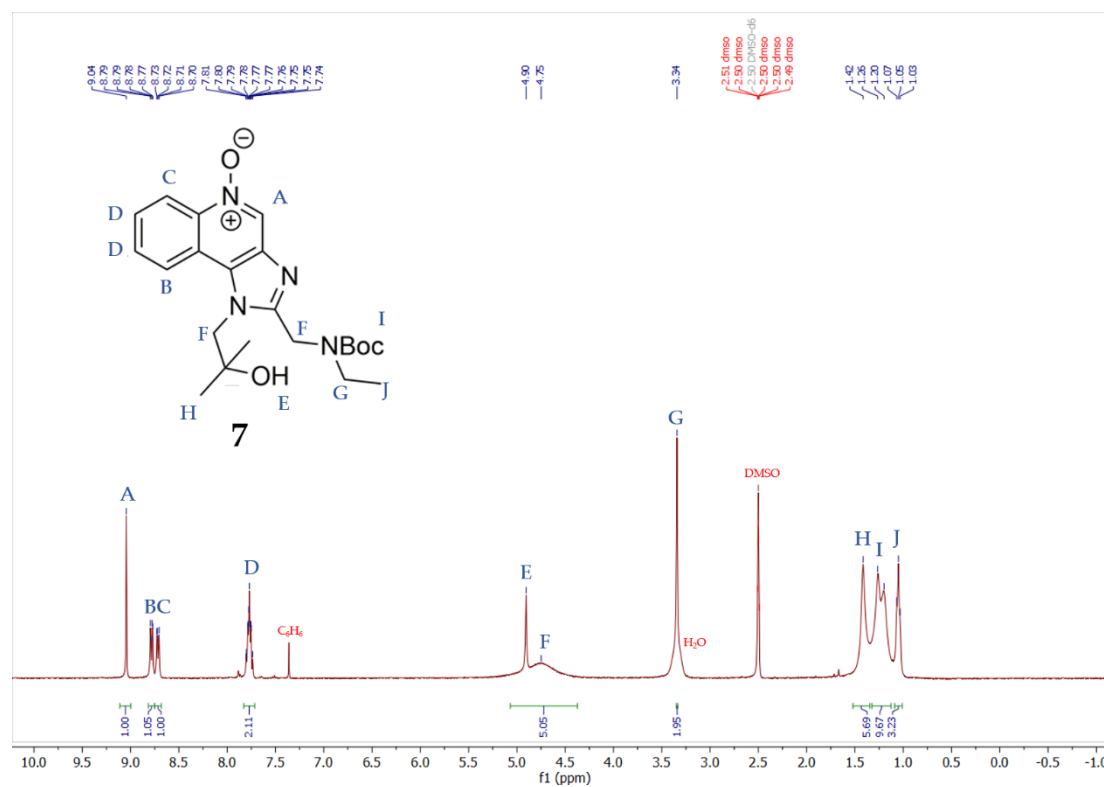

## References

1. Fujita, Y.; Hirai, K.; Nishida, K.; Taguchi, H. 6-(4-Amino-2-Butyl-Imidazoquinolyl)-Norleucine: Toll-like Receptor 7 and 8 Agonist Amino Acid for Self-Adjuvanting Peptide Vaccine. *Amino Acids* **2016**, *48*, 1319–1329, doi:10.1007/s00726-016-2190-7.
2. Gerster, J.F.; Lindstrom, K.J.; Miller, R.L.; Tomai, M.A.; Birmachu, W.; Bomersine, S.N.; Gibson, S.J.; Imbertson, L.M.; Jacobson, J.R.; Knafla, R.T.; et al. Synthesis and Structure–Activity-Relationships of 1H-Imidazo[4,5-c]Quinolines That Induce Interferon Production. *J. Med. Chem.* **2005**, *48*, 3481–3491, doi:10.1021/jm049211v.
3. Shukla, N.M.; Malladi, S.S.; Mutz, C.A.; Balakrishna, R.; David, S.A. Structure–Activity Relationships in Human Toll-Like Receptor 7-Active Imidazoquinoline Analogues. *J. Med. Chem.* **2010**, *53*, 4450–4465, doi:10.1021/jm100358c.
4. Shukla, N.M.; Kimbrell, M.R.; Malladi, S.S.; David, S.A. Regioisomerism-Dependent TLR7 Agonism and Antagonism in an Imidazoquinoline. *Bioorganic & Medicinal Chemistry Letters* **2009**, *19*, 2211–2214, doi:10.1016/j.bmcl.2009.02.100.
